# Supplementary material
Source: publisher figshare collection journal article supplement (https://gsajournals.figshare.com/articles/dataset/_/11549403)
Supplement: Supplementary file 1 [file 1]

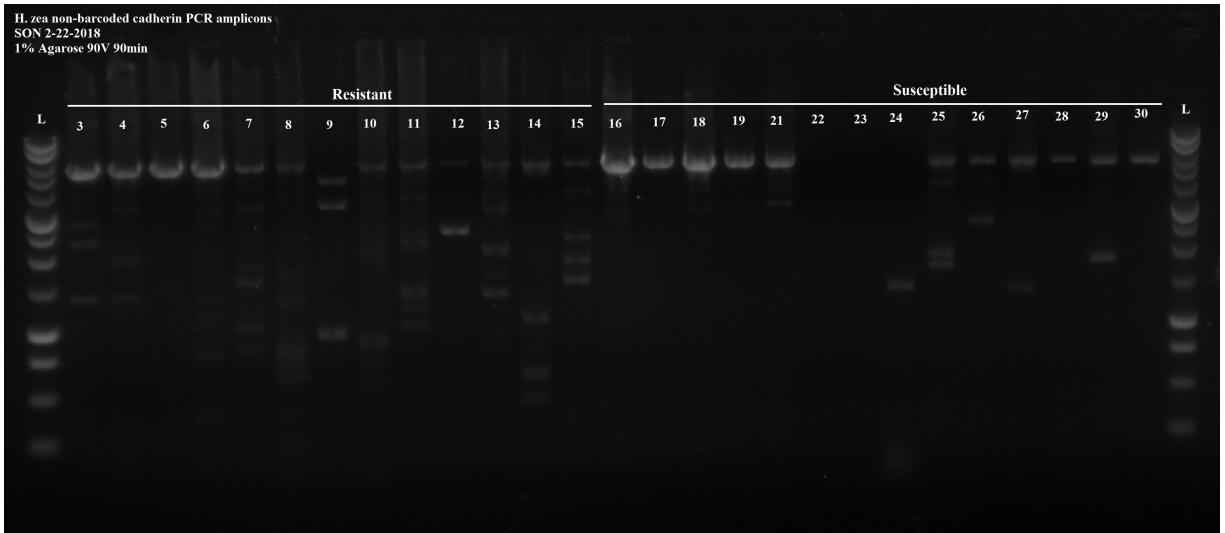

**Figure S3.** Gel image of the 5,539 bp *cad-86C* cDNA amplicons from *H. zea* larval midguts. Numbered wells represent unique individuals from the GA-R (Resistant) and GA (Susceptible) lines. Amplicons were run alongside a Promega 1kb DNA ladder.
