# Supplementary material
Source: publisher figshare collection journal article supplement (https://gsajournals.figshare.com/articles/dataset/_/11549403)
Supplement: Supplementary file 2 [file 1]

**File S2 - ExoAP Clean Protocol**

The ExoAP mastermix is made by mixing 5.3uL Exonuclease I (NEB product M0293S at 20,000 U/mL), 5.3uL Antarctic Phosphotase (NEB product M0289S at 5,000 U/mL) and 5.3 uL Antarctic Phosphatase Buffer (NEB product B0289S at 10x concentration). These were brought up to a total volume of 106 mL with PCR grade water. Once made, the mix can be added to PCR products in a ratio of 1 part ExoAP to 3 parts PCR product, and incubated in a thermal cycler under the following conditions: 37°C for 15 min, 80°C for 15 min, then held at 15°C until Sanger sequencing submission.
