# Supplementary material
Source: publisher figshare collection journal article supplement (https://gsajournals.figshare.com/articles/dataset/_/11549403)
Supplement: Supplementary file 3 [file 1]

Cedric Notredame

CPU TIME:0 sec.

SCORE=1000

\*

BAD AVG GOOD

\*

GA\_CAD86C\_Var1 : 100  
GA\_CAD86C\_Var2 : 100  
GA\_CAD86C\_Var3 : 100  
GA\_CAD86C\_Var4 : 100  
GA\_CAD86C\_Var5 : 100  
CAD86C\_Ref : 100  
cons : 100

GA\_CAD86C\_Var1 MLETLLWPRHTEINRMTFALALVVVWVAVGASAGEPVFDPSTLMRLVLVPADVPVGSVIYRVRASD  
GA\_CAD86C\_Var2 MLETLLWPRHTEINRMTFALALVVVWVAVGASAGEPVFDPSTLMRLVLVPADVPVGSVIYRVRASD  
GA\_CAD86C\_Var3 MLETLLWPRHTEINRMTFALALVVVWVAVGASAGEPVFDPSTLMRLVLVPADVPVGSVIYRVRASD  
GA\_CAD86C\_Var4 MLETLLWPRHTEINRMTFALALVVVWVAVGASAGEPVFDPSTLMRLVLVPADVPVGSVIYRVRASD  
GA\_CAD86C\_Var5 MLETLLWPRHTEINRMTFALALVVVWVAVGASAGEPVFDPSTLMRLVLVPADVPVGSVIYRVRASD  
CAD86C\_Ref MLETLLWPRHTEINRMTFALALVVVWVAVGASAGEPVFDPSTLMRLVLVPADVPVGSVIYRVRASD

cons \*\*\*\*\*

GA\_CAD86C\_Var1 PDFDYPLHFELIGQMGRLDIGVETLPCTRYNSVCQANIILLRRLEPGRYVDFRLSVRNTRGRSSRI  
GA\_CAD86C\_Var2 PDFDYPLHFELIGQMGRLDIGVETLPCTRYNSVCQANIILLRRLEPGRYVDFRLSVRNTRGRSSRI  
GA\_CAD86C\_Var3 PDFDYPLHFELIGQMGRLDIGVETLPCTRYNSVCQANIILLRRLEPGRYVDFRLSVRNTRGRSSRI  
GA\_CAD86C\_Var4 PDFDYPLHFELIGQMGRLDIGVETLPCTRYNSVCQANIILLRRLEPGRYVDFRLSVRNTRGRSSRI  
GA\_CAD86C\_Var5 PDFDYPLHFELIGQMGRLDIGVETLPCTRYNSVCQANIILLRRLEPGRYVDFRLSVRNTRGRSSRI  
CAD86C\_Ref PDFDYPLHFELIGQMGRLDIGVETLPCTRYNSVCQANIILLRRLEPGRYVDFRLSVRNTRGRSSRI

cons \*\*\*\*\*

GA\_CAD86C\_Var1 ACSVTGTNATTPRDTIFPHQPGIILVPEDAKRGTDLEIVIAKKNPVTPKPLELELWGSPLFAIRQR  
GA\_CAD86C\_Var2 ACSVTGTNATTPRDTIFPHQPGIILVPEDAKRGTDLEIVIAKKNPVTPKPLELELWGSPLFAIRQR  
GA\_CAD86C\_Var3 ACSVTGTNATTPRDTIFPHQPGIILVPEDAKRGTDLEIVIAKKNPVTPKPLELELWGSPLFAIRQR  
GA\_CAD86C\_Var4 ACSVTGTNATTPRDTIFPHQPGIILVPEDAKRGTDLEIVIAKKNPVTPKPLELELWGSPLFAIRQR  
GA\_CAD86C\_Var5 ACSVTGTNATTPRDTIFPHQPGIILVPEDAKRGTDLEIVIAKKNPVTPKPLELELWGSPLFAIRQR  
CAD86C\_Ref ACSVTGTNATTPRDTIFPHQPGIILVPEDAKRGTDLEIVIAKKNPVTPKPLELELWGSPLFAIRQR

cons \*\*\*\*\*

GA\_CAD86C\_Var1 RVSAENTEGTIFLVGPLDFEAQSMYHLTLLAVDPFIEIGKDTRNIAGLEVVVVVQDVQDMPVPVFTA  
GA\_CAD86C\_Var2 RVSAENTEGTIFLVGPLDFEAQSMYHLTLLAVDPFIEIGKDTRNIAGLEVVVVVQDVQDMPVPVFTA  
GA\_CAD86C\_Var3 RVSAENTEGTIFLVGPLDFEAQSMYHLTLLAVDPFIEIGKDTRNIAGLEVVVVVQDVQDMPVPVFTA  
GA\_CAD86C\_Var4 RVSAENTEGTIFLVGPLDFEAQSMYHLTLLAVDPFIEIGKDTRNIAGLEVVVVVQDVQDMPVPVFTA  
GA\_CAD86C\_Var5 RVSAENTEGTIFLVGPLDFEAQSMYHLTLLAVDPFIEIGKDTRNIAGLEVVVVVQDVQDMPVPVFTA  
CAD86C\_Ref RVSAENTEGTIFLVGPLDFEAQSMYHLTLLAVDPFIEIGKDTRNIAGLEVVVVVQDVQDMPVPVFTA

cons \*\*\*\*\*

GA\_CAD86C\_Var1 APPITHLPRQVAPGDMVVRVRAEDGDKGAPRQIRYGLVSEGNPFTPFNNINETSSEVTLERPIEEI  
GA\_CAD86C\_Var2 APPITHLPRQVAPGDMVVRVRAEDGDKGAPRQIRYGLVSEGNPFTPFNNINETSSEVTLERPIEEI  
GA\_CAD86C\_Var3 APPITHLPRQVAPGDMVVRVRAEDGDKGAPRQIRYGLVSEGNPFTPFNNINETSSEVTLERPIEEI  
GA\_CAD86C\_Var4 APPITHLPRQVAPGDMVVRVRAEDGDKGAPRQIRYGLVSEGNPFTPFNNINETSSEVTLERPIEEI  
GA\_CAD86C\_Var5 APPITHLPRQVAPGDMVVRVRAEDGDKGAPRQIRYGLVSEGNPFTPFNNINETSSEVTLERPIEEI  
CAD86C\_Ref APPITHLPRQVAPGDMVVRVRAEDGDKGAPRQIRYGLVSEGNPFTPFNNINETSSEVTLERPIEEI

cons \*\*\*\*\*

GA\_CAD86C\_Var1 AAISHAGAPILLTVVAEEVRLSREEPEAMSSTVQLAFILPERENSPPYFENQFYITYLDENAPQGT  
GA\_CAD86C\_Var2 AAISHAGAPILLTVVAEEVRLSREEPEAMSSTVQLAFILPERENSPPYFENQFYITYLDENAPQGT  
GA\_CAD86C\_Var3 AAISHAGAPILLTVVAEEVRLSREEPEAMSSTVQLAFILPERENSPPYFENQFYITYLDENAPQGT  
GA\_CAD86C\_Var4 AAISHAGAPILLTVVAEEVRLSREEPEAMSSTVQLAFILPERENSPPYFENQFYITYLDENAPQGT  
GA\_CAD86C\_Var5 AAISHAGAPILLTVVAEEVRLSREEPEAMSSTVQLAFILPERENSPPYFENQFYITYLDENAPQGT  
CAD86C\_Ref AAISHAGAPILLTVVAEEVRLSREEPEAMSSTVQLAFILPERENSPPYFENQFYITYLDENAPQGT

cons \*\*\*\*\*

GA\_CAD86C\_Var1 ALMFSDPYIPQVNDNDAGKNGVFSLSLVGNNGTFEISPTVAERHAQFIIKVRDNTMLDFEARKSVV  
GA\_CAD86C\_Var2 ALMFSDPYIPQVNDNDAGKNGVFSLSLVGNNGTFEISPTVAERHAQFIIKVRDNTMLDFEARKSVV  
GA\_CAD86C\_Var3 ALMFSDPYIPQVNDNDAGKNGVFSLSLVGNNGTFEISPTVAERHAQFIIKVRDNTMLDFEARKSVV  
GA\_CAD86C\_Var4 ALMFSDPYIPQVNDNDAGKNGVFSLSLVGNNGTFEISPTVAERHAQFIIKVRDNTMLDFEARKSVV  
GA\_CAD86C\_Var5 ALMFSDPYIPQVNDNDAGKNGVFSLSLVGNNGTFEISPTVAERHAQFIIKVRDNTMLDFEARKSVV  
CAD86C\_Ref ALMFSDPYIPQVNDNDAGKNGVFSLSLVGNNGTFEISPTVAERHAQFIIKVRDNTMLDFEARKSVV

cons \*\*\*\*\*

GA\_CAD86C\_Var1 FQILAQELGPATNLSVTANVTVYLNDVNDNPPIFLAQSYDVLPENVTAGTKVVQVAADDVDTGAF  
GA\_CAD86C\_Var2 FQILAQELGPATNLSVTANVTVYLNDVNDNPPIFLAQSYDVLPENVTAGTKVVQVAADDVDTGAF  
GA\_CAD86C\_Var3 FQILAQELGPATNLSVTANVTVYLNDVNDNPPIFLAQSYDVLPENVTAGTKVVQVAADDVDTGAF  
GA\_CAD86C\_Var4 FQILAQELGPATNLSVTANVTVYLNDVNDNPPIFLAQSYDVLPENVTAGTKVVQVAADDVDTGAF  
GA\_CAD86C\_Var5 FQILAQELGPATNLSVTANVTVYLNDVNDNPPIFLAQSYDVLPENVTAGTKVVQVAADDVDTGAF  
CAD86C\_Ref FQILAQELGPATNLSVTANVTVYLNDVNDNPPIFLAQSYDVLPENVTAGTKVVQVAADDVDTGAF

cons \*\*\*\*\*

GA\_CAD86C\_Var1 GKVQFTAILGYLNTSLNLDPISGVITVATNNHGFDRAMPDLHFLVEARDNDGVGLRVTVPLIIKL  
GA\_CAD86C\_Var2 GKVQFTAILGYLNTSLNLDPISGVITVATNNHGFDRAMPDLHFLVEARDNDGVGLRVTVPLIIKL  
GA\_CAD86C\_Var3 GKVQFTAILGYLNTSLNLDPISGVITVATNNHGFDRAMPDLHFLVEARDNDGVGLRVTVPLIIKL  
GA\_CAD86C\_Var4 GKVQFTAILGYLNTSLNLDPISGVITVATNNHGFDRAMPDLHFLVEARDNDGVGLRVTVPLIIKL  
GA\_CAD86C\_Var5 GKVQFTAILGYLNTSLNLDPISGVITVATNNHGFDRAMPDLHFLVEARDNDGVGLRVTVPLIIKL  
CAD86C\_Ref GKVQFTAILGYLNTSLNLDPISGVITVATNNHGFDRAMPDLHFLVEARDNDGVGLRVTVPLIIKL

cons \*\*\*\*\*

GA\_CAD86C\_Var1 LDVNDNPPEFERSLYEFVLSPSLNNFTSAAFKAVDRDSEPPNNIVRYEIIQGNMGDKFAINEDTG  
GA\_CAD86C\_Var2 LDVNDNPPEFERSLYEFVLSPSLNNFTSAAFKAVDRDSEPPNNIVRYEIIQGNMGDKFAINEDTG  
GA\_CAD86C\_Var3 LDVNDNPPEFERSLYEFVLSPSLNNFTSAAFKAVDRDSEPPNNIVRYEIIQGNMGDKFAINEDTG  
GA\_CAD86C\_Var4 LDVNDNPPEFERSLYEFVLSPSLNNFTSAAFKAVDRDSEPPNNIVRYEIIQGNMGDKFAINEDTG  
GA\_CAD86C\_Var5 LDVNDNPPEFERSLYEFVLSPSLNNFTSAAFKAVDRDSEPPNNIVRYEIIQGNMGDKFAINEDTG  
CAD86C\_Ref LDVNDNPPEFERSLYEFVLSPSLNNFTSAAFKAVDRDSEPPNNIVRYEIIQGNMGDKFAINEDTG

cons \*\*\*\*\*

GA\_CAD86C\_Var1 ELYLLEALKRTKKQNVHRRRRQSNDOEESEVFVLTIRAYDLGVPRLSSTTIKVYPPEKTRTMSF  
GA\_CAD86C\_Var2 ELYLLEALKRTKKQNVHRRRRQSNDOEESEVFVLTIRAYDLGVPRLSSTTIKVYPPEKTRTMSF  
GA\_CAD86C\_Var3 ELYLLEALKRTKKQNVHRRRRQSNDOEESEVFVLTIRAYDLGVPRLSSTTIKVYPPEKTRTMSF  
GA\_CAD86C\_Var4 ELYLLEALKRTKKQNVHRRRRQSNDOEESEVFVLTIRAYDLGVPRLSSTTIKVYPPEKTRTMSF  
GA\_CAD86C\_Var5 ELYLLEALKRTKKQNVHRRRRQSNDOEESEVFVLTIRAYDLGVPRLSSTTIKVYPPEKTRTMSF  
CAD86C\_Ref ELYLLEALKRTKKQNVHRRRRQSNDOEESEVFVLTIRAYDLGVPRLSSTTIKVYPPEKTRTMSF

cons \*\*\*\*\*

GA\_CAD86C\_Var1 IVPGANPDKKKLEEVLSLGGKVTTIIDIKPYRGSDNTATDLNGQESSQEKSEVIAVVRMSGNTAI  
GA\_CAD86C\_Var2 IVPGANPDKKKLEEVLSLGGKVTTIIDIKPYRGSDNTATDLNGQESSQEKSEVIAVVRMSGNTAI  
GA\_CAD86C\_Var3 IVPGANPDKKKLEEVLSLGGKVTTIIDIKPYRGSDNTATDLNGQESSQEKSEVIAVVRMSGNTAI  
GA\_CAD86C\_Var4 IVPGANPDKKKLEEVLSLGGKVTTIIDIKPYRGSDNTATDLNGQESSQEKSEVIAVVRMSGNTAI  
GA\_CAD86C\_Var5 IVPGANPDKKKLEEVLSLGGKVTTIIDIKPYRGSDNTATDLNGQESSQEKSEVIAVVRMSGNTAI  
CAD86C\_Ref IVPGANPDKKKLEEVLSLGGKVTTIIDIKPYRGSDNTATDLNGQESSQEKSEVIAVVRMSGNTAI

cons \*\*\*\*\*

GA\_CAD86C\_Var1 NVAKLQEQALAKNVTIYTTGTNSGGVINTGTGSGSNSGKSDHASTADGSDSGLYRAESRLLFWLLIL  
GA\_CAD86C\_Var2 NVAKLQEQALAKNVTIYTTGTNSGGVINTGTGSGSNSGKSDHASTADGSDSGLYRAESRLLFWLLIL  
GA\_CAD86C\_Var3 NVAKLQEQALAKNVTIYTTGTNSGGVINTGTGSGSNSGKSDHASTADGSDSGLYRAESRLLFWLLIL  
GA\_CAD86C\_Var4 NVAKLQEQALAKNVTIYTTGTNSGGVINTGTGSGSNSGKSDHASTADGSDSGLYRAESRLLFWLLIL  
GA\_CAD86C\_Var5 NVAKLQEQALAKNVTIYTTGTNSGGVINTGTGSGSNSGKSDHASTADGSDSGLYRAESRLLFWLLIL  
CAD86C\_Ref NVAKLQEQALAKNVTIYTTGTNSGGVINTGTGSGSNSGKSDHASTADGSDSGLYRAESRLLFWLLIL

cons \*\*\*\*\*

GA\_CAD86C\_Var1 LAILVALVLLLLICCCICEGCPLYMPPRKRVIRVNSTEDDVHLVVRDKGLGRENKSTQNIENKSIQ  
GA\_CAD86C\_Var2 LAILVALVLLLLICCCICEGCPLYMPPRKCTNM-----  
GA\_CAD86C\_Var3 LAILVALVLLLLICCCICEGCPLYMPPRKCTN-----  
GA\_CAD86C\_Var4 LAILVALVLLLLICCCICEGCPLYMPPRKRVIRVNSTEDDVHLVVRDKGLGRENKSTQNIENKSIQ  
GA\_CAD86C\_Var5 LAILVALVLLLLICCCICEGCPLYMPPRKCTN-----  
CAD86C\_Ref LAILVALVLLLLICCCICEGCPLYMPPRKRVIRVNSTEDDVHLVVRDKGLGRENKSTQNIENKSIQ

cons \*\*\*\*\* :

GA\_CAD86C\_Var1 ANEWRRREAWSAEQADLRKTPTQWKFNKRNRHRSNKEPSKPASTPGDIHQEFVHTAADNDYRYNDNR  
GA\_CAD86C\_Var2 -----  
GA\_CAD86C\_Var3 -----  
GA\_CAD86C\_Var4 ANEWRRREAWSAEQADLRKTPTQWKFNKRNRHRSNKEPSKPASTPGDIHQEFVHTAADNDYRYNDNR  
GA\_CAD86C\_Var5 -----  
CAD86C\_Ref ANEWRRREAWSAEQADLRKTPTQWKFNKRNRHRSNKEPSKPASTPGDIHQEFVHTAADNDYRYNDNR

|                |                                                                      |
|----------------|----------------------------------------------------------------------|
| cons           |                                                                      |
| GA_CAD86C_Var1 | QSFRRDGPNIITYTKEMQLQEAFANKHKEYIEDLENGYDRIATLHYQRREQDND SIRRHEIDRGSEV |
| GA_CAD86C_Var2 | -----QLQEAFANKHKEYIEDLENGYDRIATLHYQRREQDND SIRRHEIDRGSEV             |
| GA_CAD86C_Var3 | -----                                                                |
| GA_CAD86C_Var4 | QSFRRDGPNIITYTKEMQLQEAFANKHKEYIEDLENGYDRIATLHYQRREQDND SIRRHEIDRGSEV |
| GA_CAD86C_Var5 | -----                                                                |
| CAD86C_Ref     | QSFRRDGPNIITYTKEMQLQEAFANKHKEYIEDLENGYDRIATLHYQRREQDND SIRRHEIDRGSEV |
| cons           |                                                                      |
| GA_CAD86C_Var1 | GVFLKSDVDKNLHDKTDSKTKHEYSEKVRAPSTHGRDQYFIKEGNT EILRLVTRGKNEEERYVNL P |
| GA_CAD86C_Var2 | GVFLKSDVDKNLHDKTDSKTKHEYSEKVRAPSTHGRDQYFIKEGNT EILRLVTRGKNEEERYVNL P |
| GA_CAD86C_Var3 | -----                                                                |
| GA_CAD86C_Var4 | GVFLKSDVDKNLHDKTDSKTKHEYSEKVRAPSTHGRDQYFIKEGNT EILRLVTRGKNEEERYVNL P |
| GA_CAD86C_Var5 | -----                                                                |
| CAD86C_Ref     | GVFLKSDVDKNLHDKTDSKTKHEYSEKVRAPSTHGRDQYFIKEGNT EILRLVTRGKNEEERYVNL P |
| cons           |                                                                      |
| GA_CAD86C_Var1 | AQQQRPVTLIPHTQYVVVD SGKNLLMERFIREQGEEAKNIRERMSKVTDLDNISNGKDAKSYGQRS  |
| GA_CAD86C_Var2 | AQQQRPVTLIPHTQYVVVD SGKNLLMERFIREQGEEAKNIRERMSKVTDLDNISNGKDAKSYGQRS  |
| GA_CAD86C_Var3 | -----                                                                |
| GA_CAD86C_Var4 | AQQQRPVTLIPHTQYVVVD SGKNLLMERFIREQGEEAKNIRERMSKVTDLDNISNGKDAKSYGQRS  |
| GA_CAD86C_Var5 | -----                                                                |
| CAD86C_Ref     | AQQQRPVTLIPHTQYVVVD SGKNLLMERFIREQGEEAKNIRERMSKVTDLDNISNGKDAKSYGQRS  |
| cons           |                                                                      |
| GA_CAD86C_Var1 | QVGSEGQNQFHEYTNLHPEVPGTVPLKTDYLSALLEMQNKSTIHQELLESSLRKQNE LLHQILIE   |
| GA_CAD86C_Var2 | QVGSEGQNQFHEYTNLHPEVPGTVPLKTDYLSALLEMQNKSTIHQELLESSLRKQNE LLHQILIE   |
| GA_CAD86C_Var3 | -----                                                                |
| GA_CAD86C_Var4 | QVGSEGQNQFHEYTNLHPEVPGTVPLKTDYLSALLEMQNKSTIHQELLESSLRKQNE LLHQILIE   |
| GA_CAD86C_Var5 | -----                                                                |
| CAD86C_Ref     | QVGSEGQNQFHEYTNLHPEVPGTVPLKTDYLSALLEMQNKSTIHQELLESSLRKQNE LLHQILIE   |
| cons           |                                                                      |
| GA_CAD86C_Var1 | RERMLQNQETASQVESKLETQSLPGHSV MATQTECHIGTQTEPQLMKPTRRKARSDND SYSEDESQ |
| GA_CAD86C_Var2 | RERMLQNQETASQVESKLETQSLPGHSV MATQTECHIGTQTEPQLMKPTRRKARSDND SYSEDESQ |
| GA_CAD86C_Var3 | -----                                                                |
| GA_CAD86C_Var4 | RERMLQNQETASQVESKLETQSLPGHSV MATQTECHIGTQTEPQLMKPTRRKARSDND SYSEDESQ |
| GA_CAD86C_Var5 | -----                                                                |
| CAD86C_Ref     | RERMLQNQETASQVESKLETQSLPGHSV MATQTECHIGTQTEPQLMKPTRRKARSDND SYSEDESQ |
| cons           |                                                                      |
| GA_CAD86C_Var1 | MVVEDETKKVAWVKRKPKKKLKH KDPRRSMRVYDL SRKIKTPILEESEVSPSLESEKHIKISK TN |
| GA_CAD86C_Var2 | MVVEDETKKVAWVKRKPKKKLKH KDPRRSMRVYDL SRKIKTPILEESEVSPSLESEKHIKISK TN |
| GA_CAD86C_Var3 | -----                                                                |
| GA_CAD86C_Var4 | MVVEDETKKVAWVKRKPKKKLKH KDPRRSMRVYDL SRKIKTPILEESEVSPSLESEKHIKISK TN |
| GA_CAD86C_Var5 | -----                                                                |
| CAD86C_Ref     | MVVEDETKKVAWVKRKPKKKLKH KDPRRSMRVYDL SRKIKTPILEESEVSPSLESEKHIKISK TN |
| cons           |                                                                      |
| GA_CAD86C_Var1 | EREEHIKNY GDMTRSTVTTSKNETVSSTQIKISDS DRKSRLRRDVLMEISDSIDDKVESDISDRRL |
| GA_CAD86C_Var2 | EREEHIKNY GDMTRSTVTTSKNETVSSTQIKISDS DRKSRLRRDVLMEISDSIDDKVESDISDRRL |
| GA_CAD86C_Var3 | -----                                                                |
| GA_CAD86C_Var4 | EREEHIKNY GDMTRSTVTTSKNETVSSTQIKISDS DRKSRLRRDVLMEISDSIDDKVESDISDRRL |
| GA_CAD86C_Var5 | -----                                                                |
| CAD86C_Ref     | EREEHIKNY GDMTRSTVTTSKNETVSSTQIKISDS DRKSRLRRDVLMEISDSIDDKVESDISDRRL |
| cons           |                                                                      |
| GA_CAD86C_Var1 | RLQKQFSVTTDDTQLKSPLAIENDSNDNKS RSSSASKDHRNLVFSRQGSSTEAREIAAEHSSAKSK  |
| GA_CAD86C_Var2 | RLQKQFSVTTDDTQLKSPLAIENDSNDNKS RSSSASKDHRNLVFSRQGSSTEAREIAAEHSSAKSK  |
| GA_CAD86C_Var3 | -----                                                                |
| GA_CAD86C_Var4 | RLQKQFSVTTDDTQLKSPLAIENDSNDNKS RSSSASKDHRNLVFSRQGSSTEAREIAAEHSSAKSK  |
| GA_CAD86C_Var5 | -----                                                                |
| CAD86C_Ref     | RLQKQFSVTTDDTQLKSPLAIENDSNDNKS RSSSASKDHRNLVFSRQGSSTEAREIAAEHSSAKSK  |

|                |                                                                    |
|----------------|--------------------------------------------------------------------|
| cons           |                                                                    |
| GA_CAD86C_Var1 | SSDVEAQSSKLDSPSNPEPSKRVNEASESTKSSESVKPTQKSLPRYMQWYGKKSAAAKSTPAEKVV |
| GA_CAD86C_Var2 | SSDVEAQSSKLDSPSNPEPSKRVNEASESTKSSESVKPTQKSLPRYMQWYGKKSAAAKSTPAEKVV |
| GA_CAD86C_Var3 | -----                                                              |
| GA_CAD86C_Var4 | SSDVEAQSSKLDSPSNPEPSKRVNEASESTKSSESVKPTQKSLPRYMQWYGKKSAAAKSTPAEKVV |
| GA_CAD86C_Var5 | -----                                                              |
| CAD86C_Ref     | SSDVEAQSSKLDSPSNPEPSKRVNEASESTKSSESVKPTQKSLPRYMQWYGKKSAAAKSTPAEKVV |
| cons           |                                                                    |
| GA_CAD86C_Var1 | PSKPKRSSKTKNDDDKVGRYGKIMNKDTQGDSEVKKNFKSKESEFIHPRILKEEKVTPVPEGPLPD |
| GA_CAD86C_Var2 | PSKPKRSSKTKNDDDKVGRYGKIMNKDTQGDSEVKKNFKSKESEFIHPRILKEEKVTPVPEGPLPD |
| GA_CAD86C_Var3 | -----                                                              |
| GA_CAD86C_Var4 | PSKPKRSSKTKNDDDKVGRYGKIMNKDTQGDSEVKKNFKSKESEFIHPRILKEEKVTPVPEGPLPD |
| GA_CAD86C_Var5 | -----                                                              |
| CAD86C_Ref     | PSKPKRSSKTKNDDDKVGRYGKIMNKDTQGDSEVKKNFKSKESEFIHPRILKEEKVTPVPEGPLPD |
| cons           |                                                                    |
| GA_CAD86C_Var1 | VHPLLQHSEHRYEHQYENQNPLCYIQPTHIPKYLGGQPMPRKQAPEQQPIYVNQDDVKEPTQDIAE |
| GA_CAD86C_Var2 | VHPLLQHSEHRYEHQYENQNPLCYIQPTHIPKYLGGQPMPRKQAPEQQPIYVNQDDVKEPTQDIAE |
| GA_CAD86C_Var3 | -----                                                              |
| GA_CAD86C_Var4 | VHPLLQHSEHRYEHQYENQNPLCYIQPTHIPKYLGGQPMPRKQAPEQQPIYVNQDDVKEPKQDIAE |
| GA_CAD86C_Var5 | -----                                                              |
| CAD86C_Ref     | VHPLLQHSEHRYEHQYENQNPLCYIQPTHIPKYLGGQPMPRKQAPEQQPIYVNQDDVKEPTQDIAE |
| cons           |                                                                    |
| GA_CAD86C_Var1 | SALTHSISISTSYEEDRKNPEVHVSKINIGGDNIPDIAHRSVTSKIDDNDSGIAMNTLVQQNNTKR |
| GA_CAD86C_Var2 | SALTHSISISTSYEEDRKNPEVHVSKINIGGDNIPDIAHRSVTSKIDDNDSGIAMNTLVQQNNTKR |
| GA_CAD86C_Var3 | -----                                                              |
| GA_CAD86C_Var4 | SALTHSISISTSYEEDRKNPEVHVSKINIGGDNIPDIAHRSVTSKIDDNDSGIAMNTLVQQNNTKR |
| GA_CAD86C_Var5 | -----                                                              |
| CAD86C_Ref     | SALTHSISISTSYEEDRKNPEVHVSKINIGGDNIPDIAHRSVTSKIDDNDSGIAMNTLVQQNNTKR |
| cons           |                                                                    |
| GA_CAD86C_Var1 | LPITEKKSVFTIAYDDVQTKQLRPDSSSTSY                                    |
| GA_CAD86C_Var2 | LPITEKKSVFTIAYDDVQTKQLRPDSSSTSY                                    |
| GA_CAD86C_Var3 | -----                                                              |
| GA_CAD86C_Var4 | LPITEKKSVFTIAYDDVQTKQLRPDSSSTSY                                    |
| GA_CAD86C_Var5 | -----                                                              |
| CAD86C_Ref     | LPITEKKSVFTIAYDDVQTKQLRPDSSSTSY                                    |
| cons           |                                                                    |
