# Supplementary material
Source: publisher figshare collection journal article supplement (https://gsajournals.figshare.com/articles/dataset/_/11549403)
Supplement: Supplementary file 4 [file 1]

**Table S6.** Percentage identity matrix from T-coffee alignments (Notredame et al. 2010) between *H. zea* CAD-86C protein (ID=537580) and five other cadherin proteins with known roles in Bt resistance.

|            | AAM78590.1 | AF367362.1 | AF519180 | AGG36450.2 | AY198374.1 | ID=537580 |
|------------|------------|------------|----------|------------|------------|-----------|
| AAM78590.1 |            | 56         | 56       | 19         | 56         | 19        |
| AF367362.1 | 56         |            | 84       | 22         | 57         | 21        |
| AF519180   | 56         | 84         |          | 22         | 57         | 22        |
| AGG36450.2 | 19         | 22         | 22       |            | 21         | 17        |
| AY198374.1 | 56         | 57         | 57       | 21         |            | 21        |
| ID=537580  | 19         | 21         | 22       | 17         | 21         |           |

>AY198374.1 *Pectinophora gossypiella* cadherin-like protein (BtR)

>AF367362.1 *Heliothis virescens* cadherin-like protein mRNA

>AF519180 *Helicoverpa armigera* cadherin-like protein (Bt-Rm) mRNA

>AAM78590.1 midgut cadherin-like protein [*Chilo suppressalis*]

>AGG36450.2 cadherin-like protein 2 [*Chilo suppressalis*]

>ID=537580 *H. zea* CAD-86C
