# Supplementary material
Source: publisher figshare collection journal article supplement (https://gsajournals.figshare.com/articles/dataset/_/11549403)
Supplement: Supplementary file 5 [file 1]

**Table S7.** PacBio reads number before and after length filtering, minimum length = 5000 bp. Individuals GA1 through GA15 were from the GA-R line, while individuals GA16 through GA30 were from the GA line.

| <b>Samples</b> | <b>Before filtering</b> | <b>After filtering</b> | <b>Category</b> |
|----------------|-------------------------|------------------------|-----------------|
| <b>GA1</b>     | 1                       | 0                      | Resistant       |
| <b>GA2</b>     | 13                      | 0                      | Resistant       |
| <b>GA3</b>     | 964                     | 667                    | Resistant       |
| <b>GA4</b>     | 868                     | 615                    | Resistant       |
| <b>GA5</b>     | 1006                    | 697                    | Resistant       |
| <b>GA6</b>     | 948                     | 653                    | Resistant       |
| <b>GA7</b>     | 0                       | 0                      | Resistant       |
| <b>GA8</b>     | 4616                    | 253                    | Resistant       |
| <b>GA9</b>     | 2391                    | 383                    | Resistant       |
| <b>GA10</b>    | 2114                    | 198                    | Resistant       |
| <b>GA11</b>    | 1552                    | 344                    | Resistant       |
| <b>GA12</b>    | 4                       | 2                      | Resistant       |
| <b>GA13</b>    | 10640                   | 234                    | Resistant       |
| <b>GA14</b>    | 3990                    | 180                    | Resistant       |
| <b>GA15</b>    | 1752                    | 91                     | Resistant       |
| <b>GA16</b>    | 1822                    | 1135                   | Susceptible     |
| <b>GA17</b>    | 2908                    | 1947                   | Susceptible     |
| <b>GA18</b>    | 2722                    | 1774                   | Susceptible     |
| <b>GA19</b>    | 2550                    | 1697                   | Susceptible     |
| <b>GA20</b>    | 6                       | 3                      | Susceptible     |
| <b>GA21</b>    | 1928                    | 1272                   | Susceptible     |
| <b>GA22</b>    | 0                       | 0                      | Susceptible     |

|              |       |       |             |
|--------------|-------|-------|-------------|
| <b>GA23</b>  | 0     | 0     | Susceptible |
| <b>GA24</b>  | 744   | 320   | Susceptible |
| <b>GA25</b>  | 2424  | 190   | Susceptible |
| <b>GA26</b>  | 1614  | 8     | Susceptible |
| <b>GA27</b>  | 2744  | 830   | Susceptible |
| <b>GA28</b>  | 1374  | 735   | Susceptible |
| <b>GA29</b>  | 3026  | 447   | Susceptible |
| <b>GA30</b>  | 2316  | 187   | Susceptible |
| <b>Total</b> | 57037 | 14862 |             |
