# Supplementary material
Source: publisher figshare collection journal article supplement (https://gsajournals.figshare.com/articles/dataset/_/11549403)
Supplement: Supplementary file 6 [file 1]

**Table S2.** qPCR primer sequences for *cad-86C* and an endogenous control gene,  $\alpha$ -Tubulin, in *Helicoverpa zea*.

| Target Gene       | Primer Name        | Forward Sequence            | Reverse Sequence              |
|-------------------|--------------------|-----------------------------|-------------------------------|
| Cadherin-86c      | Cad_qPCR3          | 5'-CGGTAGTGATTCTG<br>GTCTCT | 5'-GGAGGCATATAAAGTG<br>GACATC |
| $\alpha$ -Tubulin | $\alpha$ Tub_qPCR1 | 5'-CATGTTGTACCGTG<br>GAGACG | 5'-CTGGTAGTTGATGCCCA<br>CCT   |
