# Supplementary material
Source: publisher figshare collection journal article supplement (https://gsajournals.figshare.com/articles/dataset/_/11549403)
Supplement: Supplementary file 7 [file 1]

**Table S1.** Primer sequences for targeted portions of the *cad-86C* gene in *Helicoverpa zea*.

| Primer Name | Forward Sequence                | Reverse Sequence              |
|-------------|---------------------------------|-------------------------------|
| Cad_1b      | 5'-CAACTTGTGGTAACGG<br>CTTTG    | 5'-TGCTTATCCTCGTGTGAATTG<br>T |
| Cad_2b      | 5'-TCCTGATAAATCACAA<br>CTCCATCT | 5'-ACGGCAAAGAGGCATTCA         |
