# Supplementary material
Source: publisher figshare collection journal article supplement (https://gsajournals.figshare.com/articles/dataset/_/11549403)
Supplement: Supplementary file 8 [file 1]

**Table S4.** Summary of Illumina reads collected for each individual. Shown are the total number of reads obtained for each individual, retained reads after filtering out low quality scores, total reads mapped to the *Helicoverpa zea* reference genome, and the mean sequencing depth.

| Sample ID | Total PE Reads | Filtered PE Reads | Mapped Reads | Mean sequence depth (×) |
|-----------|----------------|-------------------|--------------|-------------------------|
| B1        | 66,745,362     | 55,600,073        | 25,856,243   | 23.20                   |
| C1        | 46,778,103     | 37,872,611        | 18,701,181   | 16.77                   |
| D1        | 36,901,929     | 30,932,529        | 14,965,749   | 13.43                   |
| D2        | 39,279,497     | 31,755,375        | 16,842,162   | 15.11                   |
| D3        | 56,513,308     | 47,456,576        | 24,214,897   | 21.72                   |
| E1        | 46,111,320     | 38,826,792        | 19,755,879   | 17.72                   |
| E3        | 27,045,423     | 22,790,570        | 11,657,375   | 10.46                   |
| F2        | 43,250,346     | 36,592,604        | 19,233,797   | 17.26                   |
| G2        | 21,228,969     | 17,772,582        | 8,876,363    | 7.96                    |
| H1        | 43,282,524     | 36,602,796        | 18,937,097   | 16.99                   |
