# Supplementary material
Source: publisher figshare collection journal article supplement (https://gsajournals.figshare.com/articles/dataset/_/11549403)
Supplement: Supplementary file 10 [file 1]

**Table S3.** Barcoded forward primers and the reverse primer for *cad-86C* cDNA amplification.

| Primer Name    | Sequence                                    |
|----------------|---------------------------------------------|
| cadUTR_F_bar1  | 5'-GTCATCACTAAACCAAGGGTGGAGTAGTATAACGGTAGCC |
| cadUTR_F_bar2  | 5'-GTCATCACTAACCTACCTGTGGAGTAGTATAACGGTAGCC |
| cadUTR_F_bar3  | 5'-GTCATCACTAACGTGTTGGTGGAGTAGTATAACGGTAGCC |
| cadUTR_F_bar4  | 5'-GTCATCACTAACTGGACTGTGGAGTAGTATAACGGTAGCC |
| cadUTR_F_bar5  | 5'-GTCATCACTAAGAGACTGGTGGAGTAGTATAACGGTAGCC |
| cadUTR_F_bar6  | 5'-GTCATCACTAAGTCGACTGTGGAGTAGTATAACGGTAGCC |
| cadUTR_F_bar7  | 5'-GTCATCACTAATATGCCGGTGGAGTAGTATAACGGTAGCC |
| cadUTR_F_bar8  | 5'-GTCATCACTACAACCATGGTGGAGTAGTATAACGGTAGCC |
| cadUTR_F_bar9  | 5'-GTCATCACTACACAGTGTGTGGAGTAGTATAACGGTAGCC |
| cadUTR_F_bar10 | 5'-GTCATCACTACAGAAGTGGTGGAGTAGTATAACGGTAGCC |
| cadUTR_F_bar11 | 5'-GTCATCACTACAGTGACTGTGGAGTAGTATAACGGTAGCC |
| cadUTR_F_bar12 | 5'-GTCATCACTACATGTGGTGTGGAGTAGTATAACGGTAGCC |
| cadUTR_F_bar13 | 5'-GTCATCACTACCTACCATGTGGAGTAGTATAACGGTAGCC |
| cadUTR_F_bar14 | 5'-GTCATCACTACGAACGTTGTGGAGTAGTATAACGGTAGCC |
| cadUTR_F_bar15 | 5'-GTCATCACTACGTAGGAAGTGGAGTAGTATAACGGTAGCC |
| cadUTR_F_bar16 | 5'-GTCATCACTACTAGTGGTGTGGAGTAGTATAACGGTAGCC |
| cadUTR_F_bar17 | 5'-GTCATCACTACTCTGACTGTGGAGTAGTATAACGGTAGCC |
| cadUTR_F_bar18 | 5'-GTCATCACTAGAACCTTGGTGGAGTAGTATAACGGTAGCC |
| cadUTR_F_bar19 | 5'-GTCATCACTAGACATCTGGTGGAGTAGTATAACGGTAGCC |
| cadUTR_F_bar20 | 5'-GTCATCACTAGAGAGACTGTGGAGTAGTATAACGGTAGCC |
| cadUTR_F_bar21 | 5'-GTCATCACTAGATCGAAGGTGGAGTAGTATAACGGTAGCC |
| cadUTR_F_bar22 | 5'-GTCATCACTAGCAATAGGGTGGAGTAGTATAACGGTAGCC |
| cadUTR_F_bar23 | 5'-GTCATCACTAGCTACCTTGTGGAGTAGTATAACGGTAGCC |
| cadUTR_F_bar24 | 5'-GTCATCACTAGGATATGGGTGGAGTAGTATAACGGTAGCC |
| cadUTR_F_bar25 | 5'-GTCATCACTAGTCATCAGGTGGAGTAGTATAACGGTAGCC |
| cadUTR_F_bar26 | 5'-GTCATCACTAGTGAGTCTGTGGAGTAGTATAACGGTAGCC |
| cadUTR_F_bar27 | 5'-GTCATCACTAGTTCGATGGTGGAGTAGTATAACGGTAGCC |
| cadUTR_F_bar28 | 5'-GTCATCACTATACGATCGGTGGAGTAGTATAACGGTAGCC |
| cadUTR_F_bar29 | 5'-GTCATCACTATCACTCTGGTGGAGTAGTATAACGGTAGCC |
| cadUTR_F_bar30 | 5'-GTCATCACTATCTCCAGTGTGGAGTAGTATAACGGTAGCC |
| cadUTR_F_bar31 | 5'-GTCATCACTATGACTCAGGTGGAGTAGTATAACGGTAGCC |
| cadUTR_F_bar32 | 5'-GTCATCACTATGGTTCCTGTGGAGTAGTATAACGGTAGCC |
| cadUTR_F_bar33 | 5'-GTCATCACTATGTGACTGGTGGAGTAGTATAACGGTAGCC |
| cadUTR_F_bar34 | 5'-GTCATCACTATTCGATGGGTGGAGTAGTATAACGGTAGCC |
| cadUTR_R1      | 5'-TCAATCGACGGACACGAATAC                    |
