# Supplementary material
Source: publisher figshare collection journal article supplement (https://gsajournals.figshare.com/articles/dataset/_/11549403)
Supplement: Supplementary file 11 [file 1]

**Table S8.** Homozygotes and heterozygotes for the five amino acid variants of *cad-86C*. GA-R individuals are denoted as GA3-15, and GA individuals are denoted as GA16-30.

| <b>Variants</b> | <b>Homozygotes</b>                                                                   | <b>Heterozygotes</b> |
|-----------------|--------------------------------------------------------------------------------------|----------------------|
| 1               | GA3, GA4, GA6, GA8, GA10, GA11,<br>GA13, GA14, GA15, GA16, GA19, GA21,<br>GA28, GA30 | GA5, GA27            |
| 2               |                                                                                      | GA9                  |
| 3               |                                                                                      | GA9                  |
| 4               | GA17, GA18, GA25, GA29                                                               | GA5, GA27            |
| 5               | GA24                                                                                 |                      |
