# Supplementary material
Source: publisher figshare collection journal article supplement (https://gsajournals.figshare.com/articles/dataset/_/11549403)
Supplement: Supplementary file 12 [file 1]

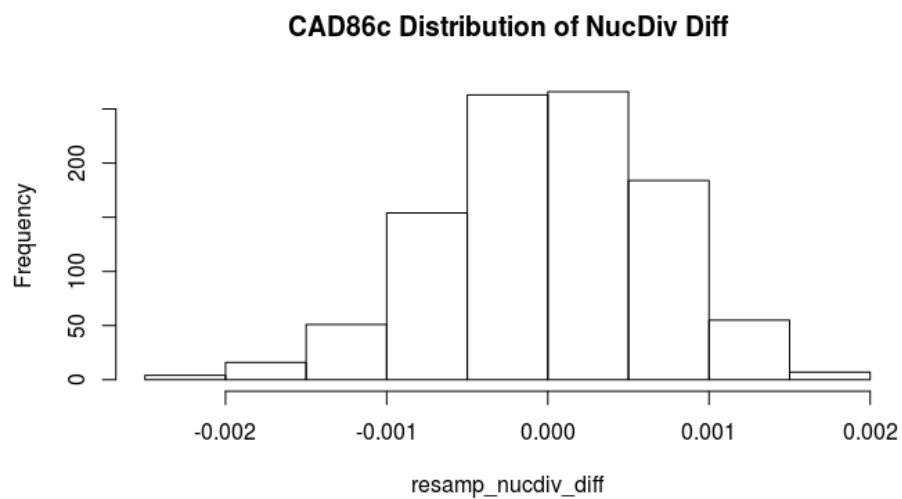

**Figure S2.** Resampling distribution generated for the permutation test to compare estimates of  $\pi$  between GA and GA-R at the *cad-86C* locus targeted by primer pair 2b.
